# Supplementary material for: Substituent effects and activation mechanism of norbornene polymerization catalyzed by three-dimensional geometry α-diimine palladium complexes
Source: Royal Society of Chemistry journal article supplement (doi:10.1039/c3py01092a), 2013-10-11
Supplement: c3py01092a.pdf [file c3py01092a.pdf]

## Supporting information

### Substituent Effects and Activation Mechanism of Norbornene Polymerization Catalyzed by Three-Dimensional Geometry $\alpha$ -Diimine Palladium Complexes

Ping Huo<sup>1,2</sup>, Wanyun Liu<sup>1,2</sup>, Xiaohui He<sup>\*1</sup>, Zhenhong Wei<sup>1</sup>, Yiwang Chen<sup>\*1</sup>

<sup>1</sup>Department of Chemistry/Institute of Polymers, Nanchang University, 999 Xuefu Avenue, Nanchang 330031, China; <sup>2</sup>Key Laboratory of Jiangxi University for Applied Chemistry and Chemical Biology, Yichun University, Yichun 336000, China

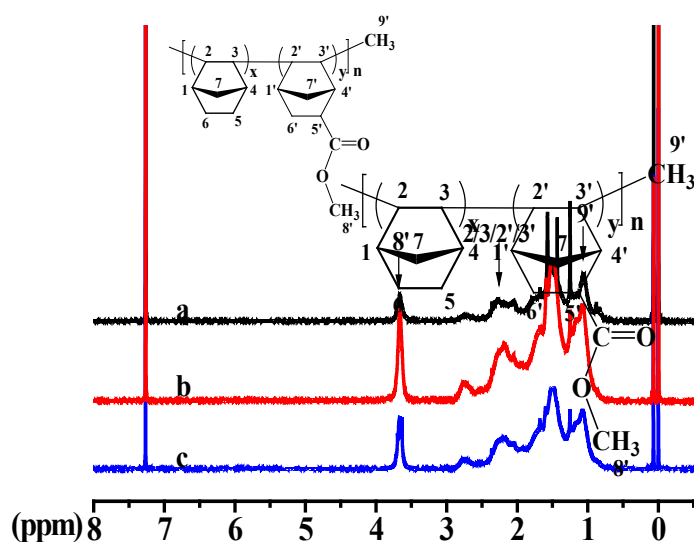

**Fig. S1** <sup>1</sup>H NMR spectra of poly(NB-co-NB-COOCH<sub>3</sub>) with (a) 20.2%, (b) 25.6%, and (c) 23.8% of NB-COOCH<sub>3</sub> molar ratios separate obtained by C1, C2, and C3/B(C<sub>6</sub>F<sub>5</sub>)<sub>3</sub> systems.

\* Corresponding author. Tel.: +86 791 83969562; fax: +86 791 83969561. E-mail address: ywchen@ncu.edu.cn (Y. Chen); hexiaohui@ncu.edu.cn (X. He).

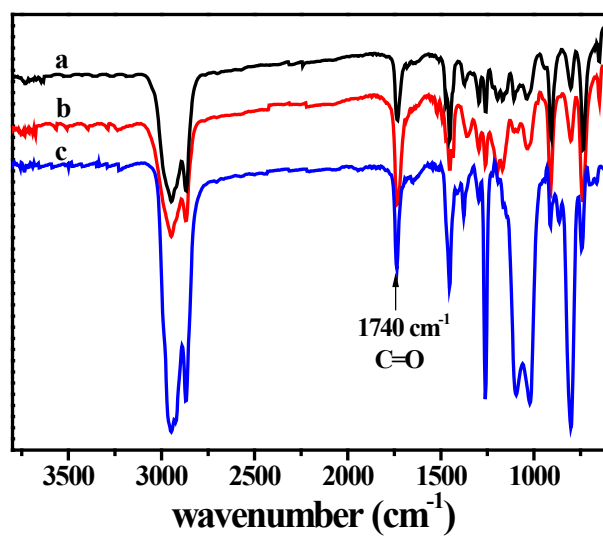

**Fig. S2** FTIR spectra of poly(NB-co-NB-COOCH<sub>3</sub>) with (a) 20.2%, (b) 25.6%, and (c) 23.8% of NB-COOCH<sub>3</sub> molar ratios separate obtained by C1, C2, and C3/B(C<sub>6</sub>F<sub>5</sub>)<sub>3</sub> systems.

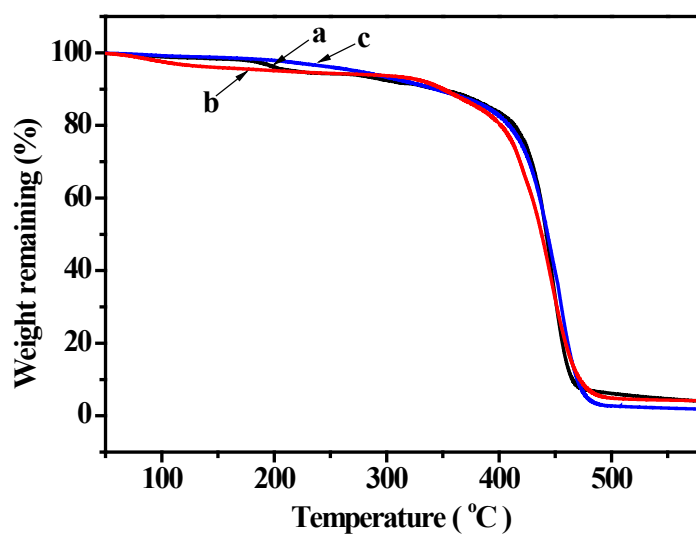

**Fig. S3** TGA curves of poly(NB-co-NB-COOCH<sub>3</sub>) with (a) 20.2%, (b) 25.6%, and (c) 23.8% of NB-COOCH<sub>3</sub> molar ratios separate obtained by C1, C2, and C3/B(C<sub>6</sub>F<sub>5</sub>)<sub>3</sub> systems. The (*T<sub>d</sub>*)s of the polymers are: (a) 382.1 °C, (b) 329.5 °C, (c) 370.8°C.

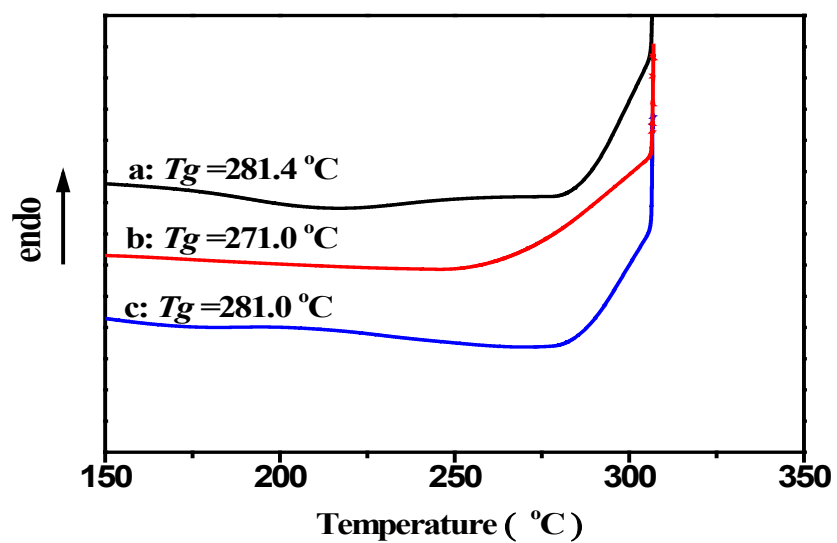

**Fig. S4** DSC curves of poly(NB-co-NB-COOCH<sub>3</sub>) with (a) 20.2%, (b) 25.6%, and (c) 23.8% of NB-COOCH<sub>3</sub> molar ratios separate obtained by C1, C2, and C3/B(C<sub>6</sub>F<sub>5</sub>)<sub>3</sub> systems.

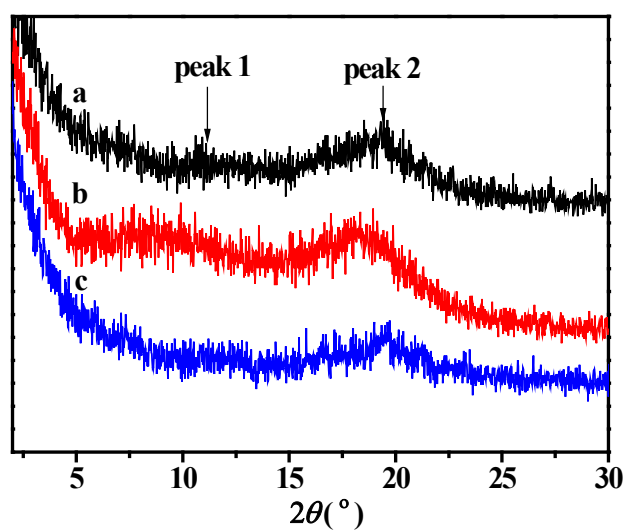

**Fig. S5** WXR D curves of poly(NB-co-NB-COOCH<sub>3</sub>) with (a) 20.2%, (b) 25.6%, and (c) 23.8% of NB-COOCH<sub>3</sub> molar ratios separate obtained by C1, C2, and C3/B(C<sub>6</sub>F<sub>5</sub>)<sub>3</sub> systems.

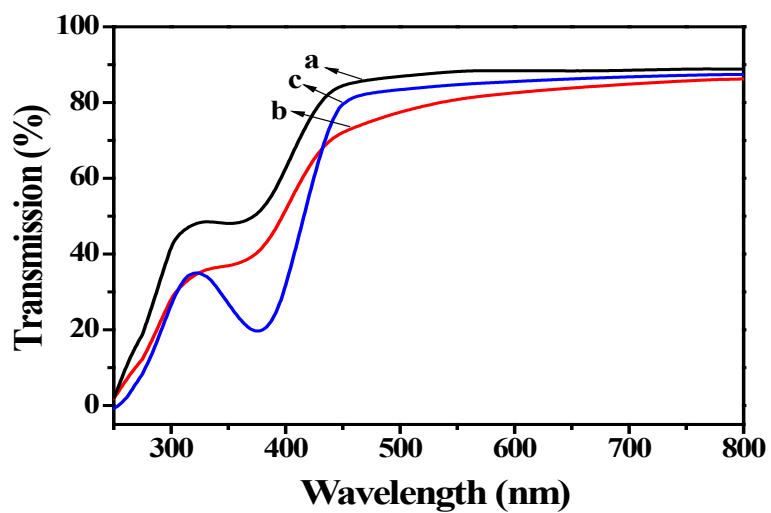

**Fig. S6** The UV-Vis curves of poly(NB-co-NB-COOCH<sub>3</sub>) with (a) 20.2%, (b) 25.6%, and (c) 23.8% of NB-COOCH<sub>3</sub> molar ratios separate obtained by C1, C2, and C3/B(C<sub>6</sub>F<sub>5</sub>)<sub>3</sub> systems.

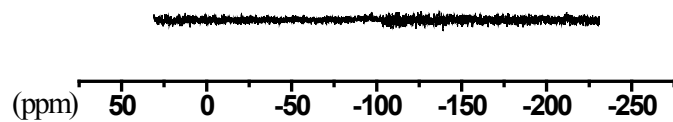

**Fig. S7**  $^{19}\text{F}$  NMR spectrum of poly(NB-co-NB-COOCH<sub>3</sub>)  
(NB-COOCH<sub>3</sub> content: 9.1%) obtained by C2/B(C<sub>6</sub>F<sub>5</sub>)<sub>3</sub> system.
